# Supplementary material
Source: HighWire-hosted journal article supplement (https://bmjopen.bmj.com/content/9/5/e026612)
Supplement: inline-supplementary-material-1 [file inline-supplementary-material-1.pdf]

## Supplementary file 1

### PRISMA-P 2015 checklist: Items to be reported in a systematic review

| Section and Topic                            | Check list item & PRISMA-P code                    | Page |
|----------------------------------------------|----------------------------------------------------|------|
| <b>Section 1: Administrative information</b> |                                                    |      |
| 1. Title:                                    | Identification [1a]                                | 1    |
|                                              | Update [1b]                                        | NA   |
| 2. Registration                              | Registration [2]                                   | 2    |
| 3. Authors:                                  | Contact [3a]                                       | 1    |
|                                              | Contributions [3b]                                 | 14   |
|                                              | Amendments [4]                                     | NA   |
| 4. Amendments                                | Amendments [4]                                     | NA   |
|                                              | Support:                                           |      |
|                                              | Sources [5a]                                       | NA   |
|                                              | Sponsor [5b]                                       | NA   |
|                                              | Role of sponsor or funder [5c]                     | NA   |
| <b>Section 2: Introduction</b>               |                                                    |      |
| 6. Rationale                                 | Rationale [6]                                      | 4-6  |
| 7. Objectives                                | Objectives [7]                                     | 6    |
| <b>Section 3: Methods</b>                    |                                                    |      |
| 8. Eligibility                               | Eligibility criteria [8]                           | 7    |
| 9. Information                               | Information sources [9]                            | 7    |
| 10. Search                                   | Search strategy [10]                               | 7    |
| 11. Study records:                           |                                                    |      |
|                                              | Data management [11a]                              | 8    |
|                                              | Selection process [11b]                            | 8    |
|                                              | Data collection process [11c]                      | 9    |
| 12. Data                                     | Data items [12]                                    | 9    |
| 13. Outcomes                                 | Outcomes and prioritization [13]                   | 9    |
| 14. Bias                                     | Risk of bias in individual studies [14]            | 10   |
| 15. Data synthesis                           |                                                    |      |
|                                              | Quantitative synthesis criteria [15a]              | 10   |
|                                              | Appropriateness of data for synthesis [15b]        | 10   |
|                                              | Sensitivity and subgroup analyses [15c]            | 10   |
|                                              | Qualitative synthesis? [15d]                       | 11   |
| 16. Meta-bias(es)                            | Meta-bias(es) [16]                                 | 11   |
| 17. Confidence in cumulative evidence        | Assessment of strength of cumulative evidence [17] | 11   |

(PRISM-P=Preferred Reporting Items for Systematic Review-Protocol)
