# Supplementary material
Source: HighWire-hosted journal article supplement (https://bmjopen.bmj.com/content/9/5/e026612)
Supplement: inline-supplementary-material-2 [file inline-supplementary-material-2.pdf]

## Supplementary file 2

### PERFORMANCE OF HOST BLOOD TRANSCRIPTOMIC SIGNATURES FOR DIAGNOSING AND PREDICTING PROGRESSION TO TUBERCULOSIS DISEASE IN HI-NEGATIVE ADULTS AND ADOLESCENTS: SEARCH STRATEGY.

| Search Item                          | Search Term                                                                                                                                                                                                                                                                                                                                                                                  | Connecting Operator |
|--------------------------------------|----------------------------------------------------------------------------------------------------------------------------------------------------------------------------------------------------------------------------------------------------------------------------------------------------------------------------------------------------------------------------------------------|---------------------|
| TB DISEASE                           | (Tuberculosis [MeSH] OR Mycobacterium tuberculosis [MeSH] OR (Tuberculosis OR TB OR Mycobacterium tuberculosis OR MTB ))                                                                                                                                                                                                                                                                     | AND                 |
| DIAGNOSTIC AND PROGNOSTIC            | (Diagnosis [MeSH] OR Diagnosis [subheading] OR Prognosis [MeSH] OR (Diagnosis OR diagnostic OR detect* OR predict* OR prognosis OR prognostic OR screen* ))                                                                                                                                                                                                                                  | AND                 |
| HOST BLOOD TRANSCRIPTOMIC SIGNATURES | (Biomarkers/Blood [MeSH] OR RNA/Blood [MeSH] OR Transcription, Genetic [MeSH] /etiology/genetics/immunology OR (Blood Biomarker OR blood biomarkers OR bio-signature OR gene expression OR genetic transcription OR host blood OR immune marker OR immunologic marker OR Ribonucleic Acid OR RNA OR signature OR surrogate endpoint OR surrogate marker OR transcriptome OR transcriptomic)) | AND                 |
| PERFORMANCE                          | (Area under Curve [MeSH] OR Sensitivity and Specificity [MeSH] OR (Area under curve OR area under curves OR AUC OR receiver operating characteristic OR ROC OR Accuracy OR Performance OR sensitivity OR specificity))                                                                                                                                                                       | AND                 |
| *ADULTS AND ADOLESCENTS              | Humans[Mesh]                                                                                                                                                                                                                                                                                                                                                                                 | AND                 |
| TIME PERIOD                          | Between 01-Jan-2005 and 31-Dec-2018                                                                                                                                                                                                                                                                                                                                                          |                     |

\* The search strategy did not filter by adults and adolescents as this may not be clearly indexed and may result in some articles being missed. Also we did not filter by HIV status as some articles may contain both HIV negative and positive cohorts.
