# Supplementary material
Source: HighWire-hosted journal article supplement (https://bmjopen.bmj.com/content/9/5/e026612)
Supplement: inline-supplementary-material-3 [file inline-supplementary-material-3.pdf]

### Supplementary file 3

## PERFORMANCE OF HOST BLOOD TRANSCRIPTOMIC SIGNATURES FOR DIAGNOSING AND PREDICTING PROGRESSION TO TUBERCULOSIS DISEASE IN HIV-NEGATIVE ADULTS AND ADOLESCENTS: A SYSTEMATIC REVIEW PROTOCOL.

### Data Extraction Form

Reviewer initials  HM  EWB  Other \_\_\_\_\_

#### Part A: Study characteristics

Author's last name: \_\_\_\_\_ Publication year: \_\_\_\_\_

Study title: \_\_\_\_\_

Country of study population: \_\_\_\_\_ Study # \_\_\_\_\_

TB Burden in study population:  Low  Intermediate  High

Study design:  Cross-sectional  Cohort  Case control  RCT  Other \_\_\_\_\_

Study type:  Diagnostic  Predictive *if predictive; follow-up time \_\_\_\_\_ months*

Study purpose:  Discovery  Validation

Sampling:  Consecutive  Convenient  Random  Other \_\_\_\_\_

#### Part C: Characteristics of tests

Index sample type :  Whole blood  PBMC

Index test (signature) type :  mRNA  Other \_\_\_\_\_

Signature name : \_\_\_\_\_ # of genes: \_\_\_\_\_ Threshold value \_\_\_\_\_

Signature discovery method:  RNA Seq  Micro array  PCR  Other \_\_\_\_\_

Signature model :  Pairwise  Random forest  SVM  Other \_\_\_\_\_

TB disease gold standard :  Culture  Xpert MTB/RIF  Smear  Other \_\_\_\_\_

#### Part B: Population characteristics

Population:  Adults  Adolescents  Children  Mixed  Undefined

Age range: \_\_\_\_\_

#### **Participant's cohort (test/validation) and disease status\*\***

| Cohort Type | Signature Name | Number of Genes | Healthy Controls <sup>a</sup> | LTBI <sup>b</sup> | Other Diseases <sup>c</sup> | TB Disease <sup>d</sup> | Total Enrolled |
|-------------|----------------|-----------------|-------------------------------|-------------------|-----------------------------|-------------------------|----------------|
|             |                |                 |                               |                   |                             |                         |                |
|             |                |                 |                               |                   |                             |                         |                |
|             |                |                 |                               |                   |                             |                         |                |
|             |                |                 |                               |                   |                             |                         |                |
|             |                |                 |                               |                   |                             |                         |                |
|             |                |                 |                               |                   |                             |                         |                |

\*\* For diagnostic studies, the number of participants in each category represents the numbers at enrolment while for predictive studies; a, b and c represent the number of participants in each category at enrolment that

### Supplementary file 3

*gave rise to the cases (d) at the end of follow-up period.*

#### **Description of negative population**

<sup>a</sup>Healthy Controls:  Healthy endemics     Healthy non-endemics     TB Contacts     Other,  
describe: \_\_\_\_\_

<sup>b</sup>Other diseases:     Non-respiratory diseases     Respiratory diseases

<sup>c</sup>LTBI :     TST>5mm     TST>10mm     IGRA     N/A

*If IGRA, IGRA type :*     QFT     Elispot     Other \_\_\_\_\_

<sup>d</sup>TB disease: *For diagnostic studies, this number represents the number of participants included in the study at enrolment while for predictive studies; this number represents the number of participants diagnosed with TB at the end of follow-up period.*

#### **Part D: Outcomes**

| Cohort Type | Signature Name | # of Genes | Sens | Spec | AUC | TP | TN | FP | FN | LR+ | LR- | RR |
|-------------|----------------|------------|------|------|-----|----|----|----|----|-----|-----|----|
|             |                |            |      |      |     |    |    |    |    |     |     |    |
|             |                |            |      |      |     |    |    |    |    |     |     |    |
|             |                |            |      |      |     |    |    |    |    |     |     |    |
|             |                |            |      |      |     |    |    |    |    |     |     |    |
|             |                |            |      |      |     |    |    |    |    |     |     |    |
|             |                |            |      |      |     |    |    |    |    |     |     |    |

**Key:** *Sens= Sensitivity; Spec= Specificity; AUC= Area under the curve; TP = True positives; FP = False positives; TN = True negatives; FN = False negatives; LR+ = Positive likelihood ratio; LR- = Negative likelihood ratio; RR = Rate Ratio for predictive studies only.*

#### **Inclusion/Exclusion Decision**

Included     Excluded     Pending

If excluded, reason:

- Excluded by title
- Children only
- Different index test
- Reference test neither Culture, Xpert/MTB RIF nor Smear Microscopy
- HIV infected only
- Mixed HIV infected and uninfected and could not desegregate the participants
- Mixed children and adults and could not desegregate the participants
- Other study design
- Diagnostic performance data not reported and unable to get from authors
